# 1   **The essential role of sodium bioenergetics and ATP** 2   **homeostasis in the developmental transitions of a** 3   **cyanobacterium**

4   **Sofia Doello, Markus Burkhardt and Karl Forchhammer\***

5   University of Tübingen, Interfaculty Institute of Microbiology and Infection Medicine, 72076 Tübingen, Germany

6   **Correspondence:** karl.forchhammer@uni-tuebingen.de

## 7   **Abstract**

8       *The ability to resume growth after a dormant period is an important strategy for the survival*  
9       *and spreading of bacterial populations. Energy homeostasis is critical in the transition into and*  
10       *out of a quiescent state. *Synechocystis* sp. PCC 6803, a non-diazotrophic cyanobacterium,*  
11       *enters metabolic dormancy as a response to nitrogen starvation. We used *Synechocystis* as a*  
12       *model to investigate the regulation of ATP homeostasis during dormancy and unraveled a*  
13       *critical role for sodium bioenergetics in dormant cells. During nitrogen starvation, cells reduce*  
14       *their ATP levels and engage sodium bioenergetics to maintain the minimum ATP content*  
15       *required for viability. When nitrogen becomes available, energy requirements rise, and cells*  
16       *immediately increase ATP levels employing sodium bioenergetics and glycogen catabolism.*  
17       *These processes allow them to restore the photosynthetic machinery and resume*  
18       *photoautotrophic growth. Our work reveals a precise regulation of the energy metabolism*  
19       *essential for bacterial survival during periods of nutrient deprivation.*

20   **Key words:** bacterial dormancy, sodium bioenergetics, nitrogen starvation, cyanobacteria,  
21   *Synechocystis*, energy homeostasis.

## 22   **Introduction**

23       Dormant microorganisms are vastly represented in natural environments (Greening et al.,  
24       2019). Dormancy highly contributes to the survival of bacterial populations, the spreading of  
25       bacterial pathogens and the development of antibiotic resistances (Lewis, 2010). The molecular  
26       processes that lead bacterial cells into a dormant state are very diverse, but are generally

27 characterized by growth arrest and residual metabolic activity (Rittershaus et al., 2013). Despite  
28 having a reduced metabolism, dormant cells still require energy for maintenance (Greening et  
29 al., 2019). In fact, energy homeostasis is known to be critical for the survival of dormant cells  
30 (Rittershaus et al., 2013). However, how the energy metabolism is regulated when bacterial  
31 cells enter and exit periods of dormancy is poorly understood due to the lack of appropriate  
32 model systems.

33 Cyanobacteria represent a highly diverse group of prokaryotes endowed with the ability to  
34 adapt to changing environmental conditions. This feature has allowed them to colonize a wide  
35 range of ecosystems (Houmard, 1995). One of the most common hurdles cyanobacterial cells  
36 face in natural environments is limitation of a combined nitrogen source (Vitousek & Howarth,  
37 1990). *Synechocystis* sp. PCC 6803 (hereafter *Synechocystis*) is a non-diazotrophic  
38 cyanobacterial strain that survives periods of nitrogen starvation by entering metabolic  
39 quiescence, thus representing a good model to study fundamental aspects of bacterial dormancy  
40 (Klotz et al., 2016). *Synechocystis* can survive prolonged periods of nitrogen starvation by  
41 undergoing nitrogen-chlorosis, a process characterized by the degradation of most of the  
42 thylakoid membranes. Cells enter cell cycle arrest and shut down their metabolism. Most of the  
43 photosynthetic apparatus is degraded, leaving cells with only residual photosynthetic capacity,  
44 and energetically costly processes, like anabolic reactions, are halted (Klotz et al., 2016). In this  
45 resting state, the intracellular ATP concentration is about  $\frac{1}{4}$  of the level during vegetative  
46 growth (Doello et al., 2018). In addition, as cells are degrading most of their cellular  
47 components, they synthesize reserve polymers, which are essential for exiting dormancy and  
48 resuming growth. Glycogen has been described as the main storage molecule during nitrogen  
49 starvation: Its synthesis and degradation are crucial for cell survival under these conditions  
50 (Doello et al., 2018; Klotz et al., 2016; Klotz & Forchhammer, 2017).

51 When nitrogen becomes available to cells in nitrogen-chlorosis, they immediately initiate a  
52 highly organized resuscitation program, which has been overall well characterized (Klotz et al.,  
53 2016; Spät et al., 2018). During the first stages of the resuscitation process, cells catabolize the  
54 accumulated glycogen to obtain the necessary energy and metabolic intermediates to restore all  
55 cellular components that had been degraded during chlorosis. When the photosynthetic  
56 machinery is restored, cells switch back to phototrophic metabolism (Klotz et al., 2016). Upon  
57 nitrogen addition, the energy requirement of chlorotic cells suddenly increases due to the  
58 initiation of energy consuming anabolic reactions, such as the glutamine synthetase/glutamate  
59 synthase (GS/GOGAT) reaction cycle. Concomitantly with the increased energy demand, the

60 low intracellular ATP concentration of dormant cells rapidly increases to an intermediate level,  
61 which represents approximately 50% of the ATP content of a vegetative growing cell (Doello  
62 et al., 2018). So far, how dormant cells produce this ATP has remained unknown. Intriguingly,  
63 we observed a rapid increase in ATP levels also in mutant cells unable to degrade glycogen  
64 (Doello et al., 2018). This observation prompted us to investigate the source of the rise in the  
65 cellular ATP content in cells that initiate the resuscitation program. The aim of this study was  
66 to reveal how dormant cells maintain the required ATP levels to keep viability, and how they  
67 obtain the necessary energy to awaken from dormancy.

## 68 Results

### 69 The rapid ATP increase in response to nitrogen availability is independent of glycogen 70 degradation and photosynthesis.

71 Upon nitrogen addition, cells start the resuscitation program and their energy demands  
72 become higher. Cells must then begin producing ATP to support nitrogen assimilation and  
73 biosynthetic processes. We measured the intracellular ATP content within the first hour of  
74 resuscitation and found that 20 minutes after the addition of sodium nitrate an increase of ~ 50  
75 % in the amount of ATP is observed, and these levels are maintained for the first hour of  
76 recovery (**Figure 1**). This ATP increase constitutes the fastest measured response of chlorotic  
77 cells to the presence of nitrogen (Klotz et al., 2016), but how cells produce it or what induces  
78 its synthesis is not yet understood.

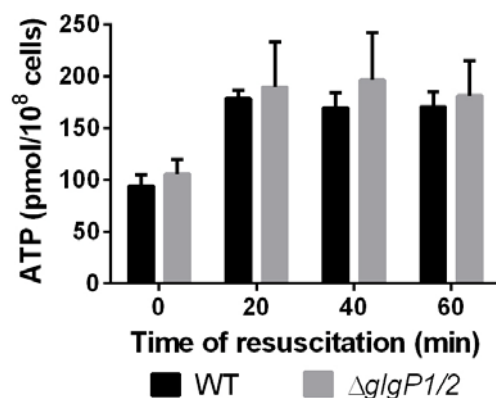

**Figure 1. The rapid increase in ATP levels upon sodium nitrate addition is independent of glycogen respiration.** ATP content normalized to  $1 \times 10^8$  cells of WT and  $\Delta glgP1/2$  chlorotic cells after addition of 17 mM NaNO<sub>3</sub>. At least three biological replicates were measured; error bars represent the SD.

79

80 A rise in the ATP levels might seem an obvious consequence of the activation of a  
81 metabolism that was dormant and enters a transient phase of heterotrophy. Therefore, it is  
82 tempting to assume that the increased ATP values at the start of resuscitation come from the

83 onset of glycogen catabolism, which is induced soon after the addition of sodium nitrate to  
84 dormant cells (Klotz et al., 2016). Previously, we observed that a mutant lacking the glycogen  
85 phosphorylases ( $\Delta glgPI/2$ ) displayed elevated ATP levels 3 hours after sodium nitrate addition,  
86 but these cells did not further recover. Here, we compared the short-term response in ATP levels  
87 between  $\Delta glgPI/2$  and wild-type (WT) in more detail and found that sodium nitrate triggered a  
88 similar rapid ATP increase in the  $\Delta glgPI/2$  mutant as it did in the WT, implying that the rapid  
89 onset of ATP synthesis does not depend on glycogen catabolism (**Figure 1**). Respiration of  
90 other metabolites can be excluded, since  $\Delta glgPI/2$  does not show any oxygen consumption  
91 upon addition of sodium nitrate. In fact, the rise in ATP levels happened before cells perform  
92 respiration at full capacity. During nitrogen-chlorosis, cells display a residual photosynthetic  
93 activity, which is completely repressed after a few hours of resuscitation, when respiration and  
94 degradation of glycogen are fully operating (Doello et al., 2018). Pulse-amplitude modulation  
95 (PAM) fluorometry measurements revealed that 1 hour after nitrate addition, much after an  
96 ATP increase is measurable, glycogen catabolism has not yet suppressed PSII activity (**Figure**  
97 **S1**). After 2 hours of resuscitation, when cells are fully respiring, the PSII activity disappears  
98 and only resumes when cells have partially restored their photosynthetic machinery (~ 12 h  
99 after nitrate addition). Thus, the observed increase in ATP levels during early resuscitation  
100 could depend on photosynthesis instead of respiration. To test this possibility, the ATP content  
101 of cells that had been incubated in the dark was measured (**Figure 2A**). Although ATP levels  
102 were overall lower in the dark than in the light, addition of sodium nitrate caused a similar  
103 increase under both conditions, indicating that photosynthesis is not responsible for the rapid  
104 ATP increase after addition of sodium nitrate. To completely exclude the role of photosynthesis  
105 on the rise of ATP levels, we treated chlorotic cells with different photosynthetic inhibitors.  
106 Exposure to dichlorophenyl dimethylurea (DCMU), which blocks the electron transfer from  
107 PSII to the plastoquinone (PQ) (**Figure 2B**), dibromthymonchion (DBMIB), which inhibits the  
108 electron flow from PQ to the cytochrome b<sub>6</sub>f complex (Cyt b<sub>6</sub>f), and Antimycin A, which  
109 disrupts the Q cycle in Cyt b<sub>6</sub>f (**Figure 2C**) did not affect the cell's ability to produce ATP after  
110 addition of sodium nitrate.

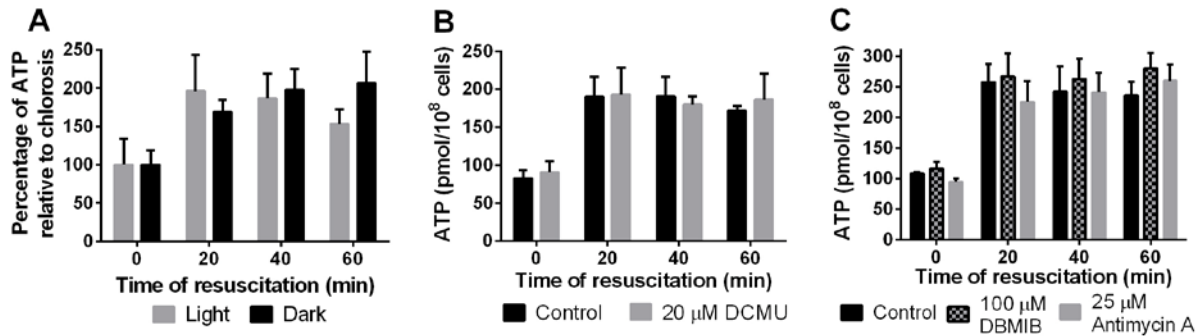

111

**Figure 2. The rapid increase in ATP levels upon sodium nitrate addition is independent of photosynthesis.** ATP content normalized to  $1 \times 10^8$  cells of WT chlorotic cells treated with (A) WT chlorotic cells after incubation for 1 h in darkness and addition of 17 mM NaNO<sub>3</sub>. (B) 20 μM DCMU and (C) 100 μM DBMIB and 25 μM Antimycin A. Cells were treated for 5 min before the first measurement (0 min). Resuscitation was then induced by addition of 17 mM NaNO<sub>3</sub>. At least three biological replicates were measured; error bars represent the SD.

## 112 The ATP increase relies on a sodium-motive force.

113 Respiration and photosynthesis are the two main bioenergetic processes that generate an  
114 electrochemical proton gradient that can be used by the ATP synthase to power ATP  
115 production. When both processes were blocked, nitrogen-starved cells could still increase ATP  
116 levels upon addition of sodium nitrate. To elucidate the contribution of proton-motive force on  
117 the rise in ATP levels, chlorotic cells were treated with the protonophores carbonyl cyanide m-  
118 chlorophenyl hydrazone (CCCP) and 2,3-dinitrophenol (DNP). Protonophores make  
119 membranes permeable to protons, thus destroying proton gradients. Intriguingly, treatment with  
120 CCCP and DNP did not abolish the rise in ATP levels (**Figure 3**), indicating that ATP synthesis  
121 does not depend on an electrochemical proton gradient. However, protons are not the only ion  
122 motive force that can be coupled to ATP synthesis, as some ATP synthases can also use a  
123 sodium-motive force to power ATP production (Schulz et al., 2013). Sodium ions are more  
124 abundant in the extracellular medium than in the cytoplasm, thus forming a gradient across the  
125 plasma membrane that can be utilized by sodium-binding ATP synthases to produce ATP.  
126 Besides the thylakoidal ATP synthases, which translocate the protons accumulated in the  
127 thylakoid lumen into the cytoplasm to produce ATP, *Synechocystis* also possesses ATP  
128 synthases in the plasma membrane (Huang et al., 2002), which might use a sodium-motive  
129 force.

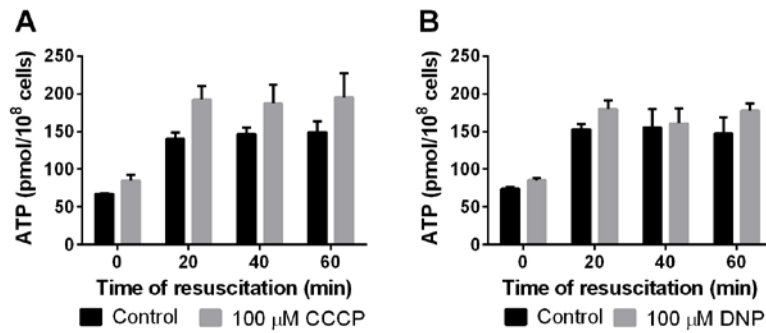

**Figure 3. Dissipation of the proton gradient does not inhibit the rapid increase in ATP levels.** ATP content normalized to  $1 \times 10^8$  cells of WT chlorotic cells treated with (A) 100  $\mu\text{M}$  CCCP and (B) 100  $\mu\text{M}$  DNP. Cells were treated for 5 min before the first measurement (0 min). Resuscitation was then induced by addition of 17 mM  $\text{NaNO}_3$ . At least three biological replicates were measured; error bars represent the SD.

130

131 The above experiments were performed by adding 17 mM sodium nitrate to chlorotic cells  
132 in nitrogen-free  $\text{BG}_{11-0}$  medium, increasing the sodium concentration 4-fold. This raised the  
133 question whether the rapid increase of intracellular ATP is connected to the sudden rise in  
134 sodium levels. To test this, recovery experiments were performed by the addition of 17 mM  
135 potassium nitrate or 5 mM ammonium chloride to cells in  $\text{BG}_{11-0}$  (**Figure 4A**). In these cases,  
136 the concentration of sodium remained constant. Remarkably, the ATP increase was  
137 significantly lower than in the previous experiments with the addition of 17 mM sodium nitrate.  
138 The rapid rise in ATP levels could be restored when 17 mM sodium chloride was added together  
139 with potassium nitrate or ammonium chloride to dormant cells (**Figure 4B**). When sodium was  
140 completely removed from the medium by repeated washing with  $\text{BG}_{11-0-\text{Na}}$  (in which all sodium  
141 salts have been substituted by potassium salts), addition of potassium nitrate triggered almost  
142 no increase of ATP levels (**Figure 4C**). These results demonstrated that sodium plays an  
143 important role in ATP synthesis in chlorotic cells. However, whether or not the addition of a  
144 nitrogen source also contributes to the rise in ATP levels remained unclear, since cells in  
145 sodium-free medium still reacted to the addition of potassium nitrate with a small increase in  
146 the concentration of ATP. To address this question, sodium and nitrogen were added to dormant  
147 cells sequentially. As shown in **Figure 4D**, the sole addition of 17 mM sodium chloride to  
148 chlorotic cells in  $\text{BG}_{11-0}$  caused a partial increase of the ATP levels within 20 minutes, compared  
149 to the standard resuscitation experiment. When 20 minutes after supplementation with sodium  
150 chloride a nitrogen source was added to the cells, either as potassium nitrate (**Figure 4D**,  
151 **column A**) or as ammonium chloride (**Figure 4D**, **column B**), a further rise in ATP levels was  
152 observed after 1 hour. This indicates that the rise in ATP levels that was initially observed when  
153 sodium nitrate was added to chlorotic cells has two components: One due to the increase in the  
154 sodium concentration, and another one due to the presence of a nitrogen source. To distinguish  
155 whether the cells directly sense the nitrogen source or detect it through initiating assimilation  
156 via the GS-GOGAT cycle, cells were treated with the GS inhibitor L-methionine sulfoximine



157 (MSX). Indeed, this treatment completely abolished the nitrogen-dependent component of the  
 158 ATP increase (**Figure 4D, column C**), indicating that cells respond to the assimilation of  
 159 ammonium rather than to the external presence of a combined nitrogen source. Interestingly,  
 160 the  $\Delta glgP1/2$  mutant only reacted to sodium and did not show the nitrogen-dependent  
 161 component of the ATP increase (**Figure 4D, column D**). These results show that both,  
 162 activation of nitrogen assimilation and glycogen degradation, are required for the nitrogen-  
 163 dependent ATP increase.

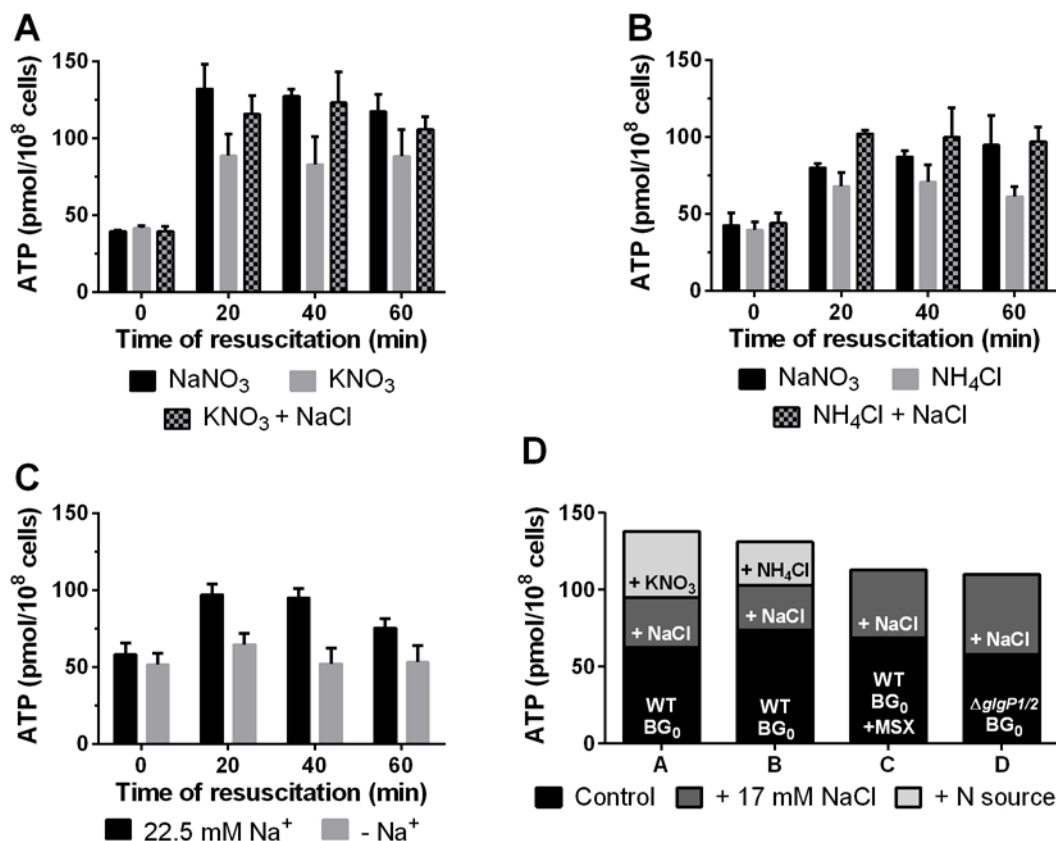

164

**Figure 4. The rise of cellular ATP upon sodium nitrate addition is a response to both, increased sodium concentrations and nitrogen assimilation.** ATP content normalized to  $1 \times 10^8$  cells of WT chlorotic cells. (A) Cells were resuscitated using either 17 mM NaNO<sub>3</sub>, 17 mM KNO<sub>3</sub>, or 17 mM KNO<sub>3</sub> + 17 mM NaCl. (B) Cells were resuscitated using either 17 mM NaNO<sub>3</sub>, 5 mM NH<sub>4</sub>Cl, or 5 mM NH<sub>4</sub>Cl + 17 mM NaCl. (C) Cells were washed twice with BG<sub>11-0-Na</sub> sodium-free medium and resuscitated with 17 mM KNO<sub>3</sub>. (D) ATP content normalized to  $1 \times 10^8$  cells of chlorotic cells in BG<sub>11-0</sub> (black), after supplementation with 17 mM NaCl (dark grey) and after additional supplementation with a nitrogen source (light grey). Column A: untreated WT chlorotic cells supplemented with 17 mM NaCl and 17 mM KNO<sub>3</sub>. Column B: untreated WT chlorotic cells supplemented with 17 mM NaCl and 5 mM NH<sub>4</sub>Cl. Column C: WT chlorotic cells treated with 200  $\mu$ M MSX and supplemented with 17 mM NaCl and 17 mM KNO<sub>3</sub>. Column D: untreated  $\Delta glgP1/2$  chlorotic cells supplemented with 17 mM NaCl and 17 mM KNO<sub>3</sub>. At least three biological replicates were measured; error bars represent the SD.

165 In order to corroborate the role of sodium in ATP synthesis during chlorosis, nitrogen-  
166 starved cells were treated with monensin, a sodium ionophore, and ethyl-isopropyl amiloride  
167 (EIPA), an inhibitor of sodium channels and sodium/proton antiport. To exclude any indirect  
168 effects caused by possible interference of the inhibitors with nitrate transport, the effect of  
169 monensin and EIPA on the ATP content was measured after adding a combination of  
170 ammonium chloride and sodium chloride to chlorotic cells. Treatment with monensin led to  
171 lower ATP levels than the untreated control (**Figure 5A**). More strikingly, exposure to EIPA  
172 completely abolished the increase in ATP levels (**Figure 5B**), proving the key role of sodium  
173 in the bioenergetics of chlorotic cells.

174 To ascertain whether the ATP synthases are responsible for the sodium-dependent  
175 component of the ATP increase, chlorotic cells were treated with the potent F-ATPase inhibitor  
176 N, N'-dicyclohexylcarbodiimide (DCCD). Cells that were exposed to DCCD showed a reduced  
177 response to the addition of sodium chloride as compared to untreated cells (**Figure 5C**),  
178 confirming that the sodium-dependent ATP increase relies on the activity of the ATP synthases.

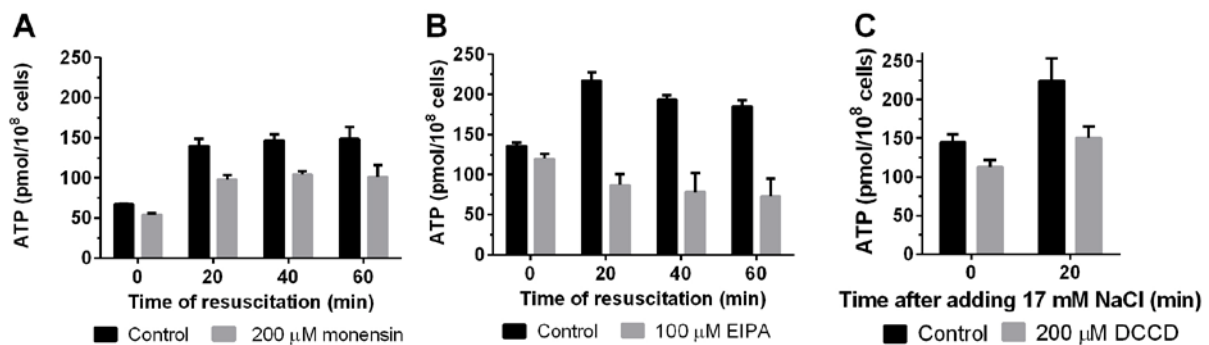

179

**Figure 5. Dissipation of the sodium ion gradient, inhibition of sodium ion transport across the membrane, and inhibition of F-ATPases dampens the rapid rise in intracellular ATP.** ATP content normalized to 1 x 10<sup>8</sup> cells of WT chlorotic cells treated with (A) 200 μM monensin, (B) 100 μM EIPA, and (C) 200 μM DCCD. Cells were treated for 5 min before the first measurement (0 min). In (A) and (B), resuscitation was induced by addition of 5 mM NH<sub>4</sub>Cl + 17 mM NaCl. In (C) only 17 mM NaCl was added to induce sodium-dependent ATP synthesis. At least three biological replicates were measured; error bars represent the SD.

## 180 Sodium requirement depends on the cellular growth stage.

181 Hitherto, it remained unclear if cells engage sodium bioenergetics exclusively during  
182 nitrogen-chlorosis or if sodium-dependent ATP synthesis is a part of *Synechocystis* metabolism  
183 in general. To answer this question, vegetative cells were treated with monensin and EIPA. The  
184 ATP content of vegetative cells was not affected after treatment with monensin for 30 minutes



185 **(Figure 6A)**. By contrast, EIPA slightly reduced the ATP levels by 25% in vegetative cells  
186 **(Figure 6B)**. However, treatment with EIPA also completely inhibited PSII activity **(Figure**  
187 **S2)**, suggesting that the observed lower ATP levels might be a consequence of the inhibitory  
188 effect of EIPA on photosynthesis rather than a direct effect on sodium-dependent ATP  
189 synthesis. These results indicate that, while sodium bioenergetics plays a key role during  
190 nitrogen starvation, vegetative cells do not rely on sodium-dependent ATP synthesis.

191 To further elucidate the role of sodium on the metabolism of *Synechocystis*, vegetative and  
192 nitrogen-starved cells were cultivated in sodium-free medium. Under atmospheric gas  
193 conditions in shaking flasks, vegetative cells could not grow in the absence of sodium; however,  
194 growth in sodium-free medium could be restored when cells were supplemented with 2% CO<sub>2</sub>  
195 **(Figure 6C)**. These findings are explained by the fact that sodium is required for bicarbonate  
196 uptake through the SbtA and BicA transporters (Burnap et al., 2015; Shibata et al., 2002). Thus,  
197 sodium-dependent bicarbonate transport is essential for growth under conditions of atmospheric  
198 CO<sub>2</sub> supply, but cells do not require sodium with elevated CO<sub>2</sub> concentrations. Conversely,  
199 nitrogen-starved cells showed a decreasing optical density when cultivated in sodium-free  
200 medium, even when they were supplemented with 2 % CO<sub>2</sub> **(Figure 6D)** indicating a  
201 requirement for sodium beyond the need for inorganic carbon transport.

202 In the presence of sodium, during the first 24 hours after nitrogen deprivation, cells  
203 synthesize large amounts of glycogen. In sodium-free medium and under atmospheric gas  
204 conditions, cells accumulate only ~ 50 % of the amount of glycogen after 2 days of nitrogen  
205 starvation as compared to the standard medium, and upon further incubation, glycogen levels  
206 further decreased **(Figure 6E)**. When cells were nitrogen-starved under standard conditions for  
207 24 hours, until they reached the maximum glycogen content, and were then transferred to  
208 sodium-free medium, the glycogen concentration progressively decreased after sodium removal  
209 **(Figure 6E)**. This finding suggests that the absence of sodium triggers glycogen catabolism.  
210 When resuscitation of chlorotic cells in sodium-free medium was initiated by the addition of  
211 potassium nitrate (conditions in which only a low ATP increase was observed, see above), they  
212 showed higher respiration rates than cells resuscitating under standard conditions **(Figure 6F)**.  
213 However, these cells were unable to complete the resuscitation process despite being able to  
214 switch on the initial steps of the resuscitation metabolism: They never re-greened and  
215 eventually lost viability, as shown by the complete loss of photosynthetic activity **(Figure S1)**.  
216 This further emphasizes the dependence of chlorotic cells on sodium bioenergetics.

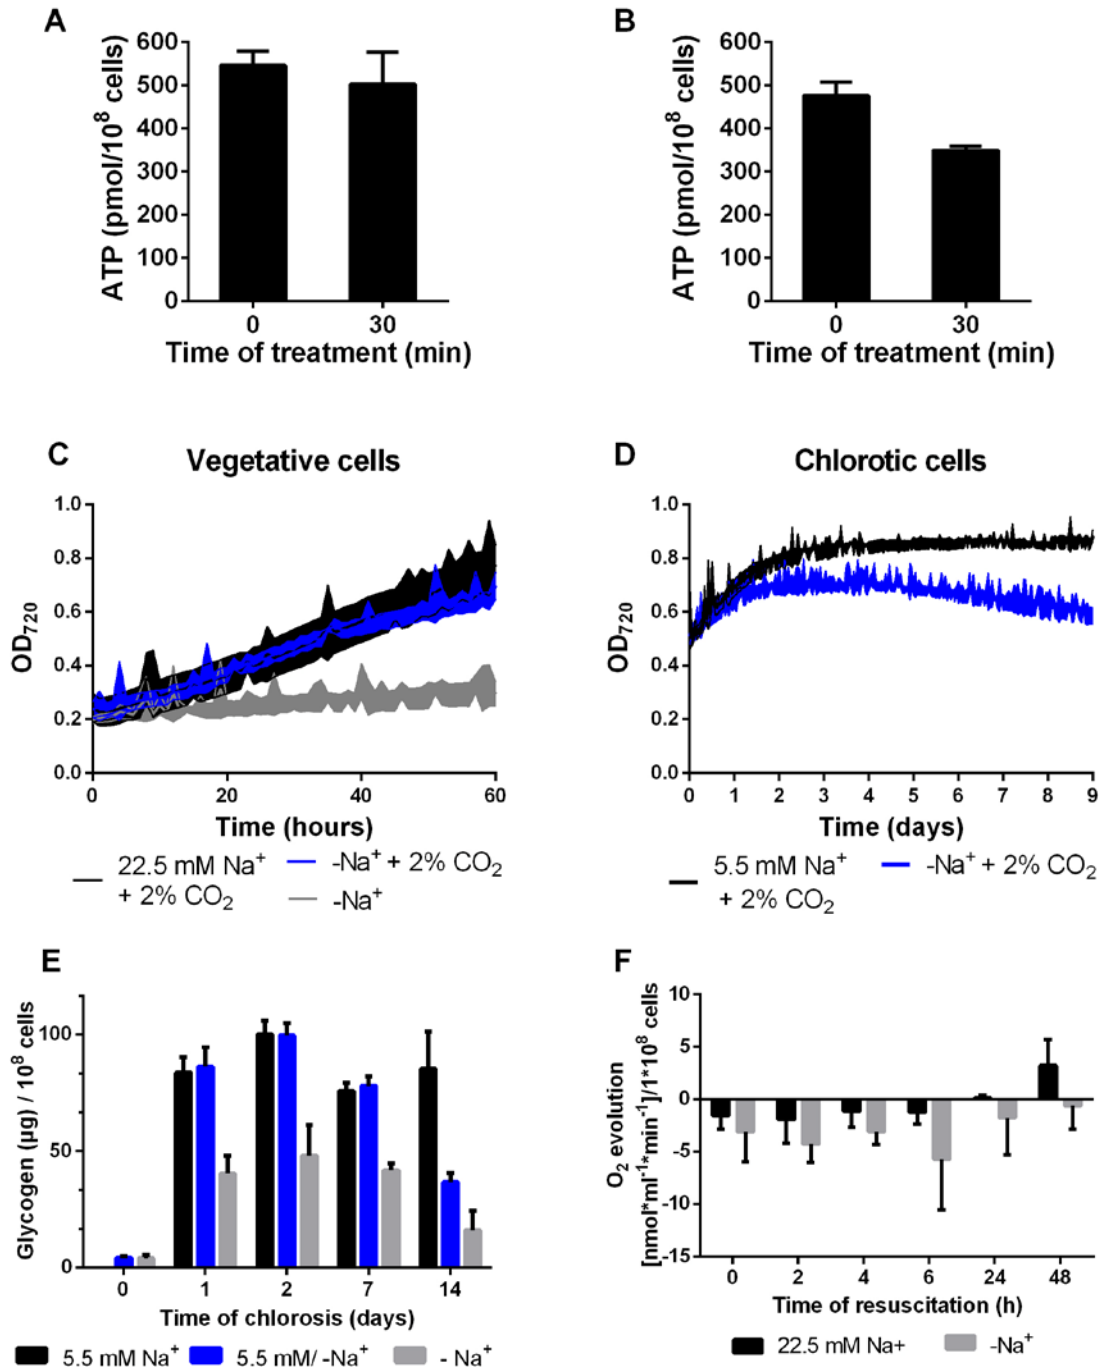

217

**Figure 6. Sodium is required for bicarbonate uptake but not for ATP synthesis during vegetative growth.** (A) ATP content normalized to  $1 \times 10^8$  cells of vegetative cells treated with  $200 \mu\text{M}$  monensin for 30 minutes. (B) ATP content normalized to  $1 \times 10^8$  cells of vegetative cells treated with  $100 \mu\text{M}$  EIPA for 30 minutes. (C) Optical density at 720 nm of vegetative cells in regular BG<sub>11</sub> supplemented with 2 % CO<sub>2</sub> (black line) and in BG<sub>11-Na</sub> sodium-free medium with ambient air (grey line) and 2% CO<sub>2</sub> supplementation (blue line). (D) Optical density at 720 nm of chlorotic cells in regular BG<sub>11-0</sub> supplemented with 2 % CO<sub>2</sub> (black line) and in BG<sub>11-0-Na</sub> sodium-free medium supplemented with 2% CO<sub>2</sub> (blue line). (E) Glycogen content normalized to  $1 \times 10^8$  cells throughout chlorosis of WT cells in medium containing 5.5 mM sodium (black bars, standard conditions), sodium-free medium (grey bars) and cells that were cultivated in standard conditions, i.e. 5.5 mM sodium, for 24 h and then transferred to sodium-free medium (blue bars). (F) Oxygen evolution of resuscitating WT cells in medium containing 22.5 mM sodium (black bars, standard conditions) and sodium-free medium (grey bars). At least three biological replicates were measured; error bars represent the SD.

218 **ATP levels are rapidly tuned depending on the metabolic requirements.**

219 So far, the analysis of sodium requirement in vegetative and chlorotic cells showed that  
220 vegetative cells require sodium for bicarbonate transport, whereas chlorotic cells require  
221 sodium for bioenergetics. When vegetative cells are shifted to nitrogen-deprived conditions,  
222 they are initially photosynthetically competent. In order to elucidate how ATP levels are  
223 affected after transferring vegetative cells to nitrogen-deprived conditions at different sodium  
224 concentrations, we analyzed the ATP content of vegetative cells after they were transferred  
225 either into regular BG<sub>11-0</sub> (5.5 mM sodium) or into BG<sub>11-0</sub> supplemented with 17 mM sodium  
226 chloride, which equals the concentration of sodium in BG<sub>11</sub> (22.5 mM). Already 30 min after  
227 shifting to nitrogen-deficient medium, the ATP levels dropped to approximately one third of  
228 the initial value, regardless of the sodium concentration. Subsequently, the ATP content was  
229 then maintained at this low level during long-term chlorosis (**Figure 7A**). To ensure that the  
230 decrease in ATP levels was not simply due to a globally reduced level of nucleotides, we  
231 determined the ATP to ADP ratio, which should stay constant in the case of a general adenine  
232 nucleotide decrease. As shown in **Figure 7B**, the ratio dropped in a similar manner than ATP  
233 levels decreased, indicating a reduced energy charge rather than a decrease of nitrogen-  
234 containing compounds after nitrogen removal. This implies that cells specifically adjust ATP  
235 levels as a response to severe metabolic imbalance for the consequent need to globally modify  
236 cellular processes.

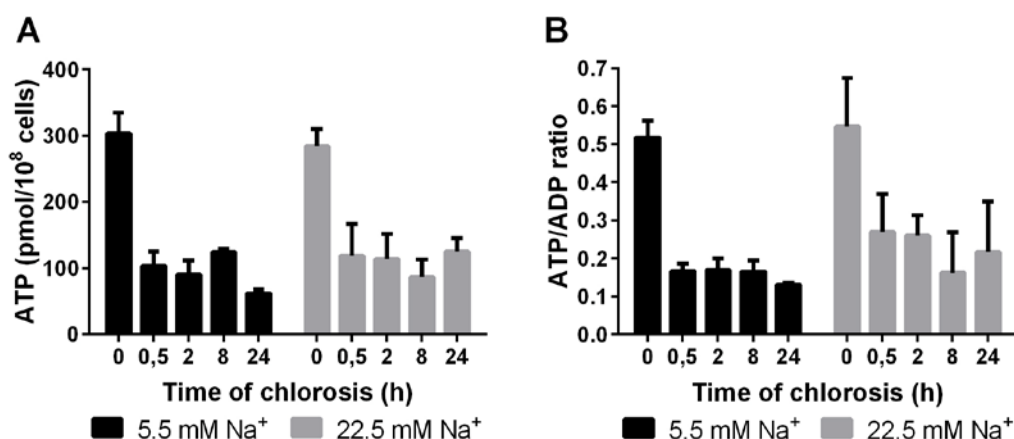

237

**Figure 7. The ATP concentration is rapidly reduced after nitrogen step-down even in the presence of high sodium.** (A) ATP content normalized to  $1 \times 10^8$  cells of WT cells after nitrogen deprivation in standard conditions (5.5 mM sodium, black bars) and high-sodium conditions (22.5 mM sodium, grey bars). (B) ATP/ADP ratio of WT cells after nitrogen deprivation in standard conditions (5.5 mM sodium, black bars) and high-sodium conditions (22.5 mM sodium, grey bars) At least three biological replicates were measured; error bars represent the SD.

## 238 Discussion

### 239 *Synechocystis* engages sodium bioenergetics during nitrogen starvation.

240 During nitrogen-chlorosis, *Synechocystis* re-arranges its metabolism to reach a state of  
241 dormancy that allows cell survival for a prolonged starvation time. This metabolic adaptation  
242 includes reduction of both energy consumption and production. Thus, chlorotic cells keep ATP  
243 low, just at the minimum level to ensure cell survival (~ 50-100 pmol/ 10<sup>8</sup> cells) (Doello et al.,  
244 2018). When a nitrogen source is added to chlorotic cells, the ATP demand increases  
245 immediately due to the ammonium-assimilating GS-reaction, which consumes one ATP per  
246 ammonium, the concomitant GOGAT reaction and all the following anabolic processes that are  
247 induced at the onset of resuscitation (Klotz et al., 2016; Spät et al., 2018). Cells respond  
248 accordingly and almost immediately increase their ATP levels by about ~50 % to power the  
249 anabolic reactions.

250 Most of the cellular ATP is produced by the ATP-synthases from ADP and inorganic  
251 phosphate. In cyanobacteria, this reaction typically requires an electrochemical proton gradient  
252 across the thylakoid membrane, which is generated by photosynthetic or respiratory electron  
253 transport (Imashimizu et al., 2011). However, chlorotic cells could still increase ATP levels  
254 within several minutes, even when the two main bioenergetic processes that generate a proton  
255 gradient were inhibited. We could identify the nature of this increase in the ATP content and  
256 dissect it into two components: One that is purely sodium-dependent, and a second one that was  
257 triggered by ammonium assimilation and supported by glycogen degradation.

258 Chlorotic cells have largely degraded their thylakoids, and therefore the space for thylakoidal  
259 ATP synthases and proton storage is limited (Klotz et al., 2016). Previous studies have reported  
260 the presence of ATP synthases in the plasma membrane of *Synechocystis* (Huang et al., 2002),  
261 which suggests that cells could use an extracellular electrochemical gradient to power ATP  
262 synthesis. However, cyanobacteria preferably grow under alkaline conditions, where the  
263 abundance of protons is extremely low. By contrast, sodium ions are highly abundant in the  
264 extracellular medium and cells are exposed to a natural sodium gradient due to sodium extrusion  
265 from the cytoplasm. The first component of the rapid rise in intracellular ATP that was triggered  
266 by addition of sodium nitrate to chlorotic cells can be explained by an increase in the sodium-  
267 motive force. The second component of the ATP increase could be prevented by treatment with  
268 MSX, a specific GS inhibitor, and was absent in a mutant unable to degrade glycogen. This  
269 suggests that initiation of nitrogen assimilation triggers glycogen catabolism, which supports

270 ATP synthesis via substrate level phosphorylation and, even more efficiently, by supporting  
271 respiration. These results show that bioenergetics of chlorotic cells is largely based on sodium,  
272 which allows chlorotic cells to keep the minimum intracellular ATP concentration to maintain  
273 cell viability during metabolic dormancy, even in an alkaline environment.

#### 274 **Energy homeostasis in *Synechocystis***

275 In contrast to chlorotic cells, vegetative cells do not rely on sodium-dependent ATP  
276 synthesis. As shown here, and in agreement with previous studies (Burnap et al., 2015; Shibata  
277 et al., 2002), vegetative cells require sodium primarily for sodium-dependent bicarbonate  
278 uptake. During vegetative growth, the major ATP synthesis machinery is located in the  
279 thylakoid membranes, where photosynthetic and respiratory complexes generate a proton-  
280 motive force to power ATP synthesis (Imashimizu et al., 2011). Upon nitrogen starvation,  
281 nitrogen assimilation and most anabolic processes are halted. Under these circumstances, ATP  
282 levels would be expected to increase, since at this point the ATP synthesis machinery is still  
283 intact and the most energy consuming reactions in the cell stop taking place. However, when  
284 cells were transferred to nitrogen-free medium, a rapid and steep decrease in ATP levels was  
285 observed, independently of the concentration of sodium in the medium. The fact that cells  
286 respond in this opposite way, decreasing their ATP content instead of increasing it, suggests  
287 the existence of a powerful, yet unexplored regulatory mechanism of tuning ATP levels.

288 Reduced ATP levels have previously been reported in bacterial cells during periods of  
289 metabolic dormancy. In *Mycobacterium tuberculosis*, the ATP content in nutrient-starved cells  
290 are steadily maintained at a constant level which is 5-fold lower than the levels in growing cells  
291 (Rittershaus et al., 2013). However, whether the decreased ATP content is a consequence of a  
292 reduced metabolic activity during bacterial dormancy, or if low ATP levels are required to reach  
293 this metabolic state, has not been elucidated. In *Synechocystis*, mutants unable to synthesize  
294 glycogen ( $\Delta glgA1/2$  and  $\Delta glgC$ ) present higher ATP levels than the WT and fail to perform a  
295 proper acclimation response to nitrogen starvation, which leads to death (Gründel *et al.*, 2012;  
296 Cano *et al.*, 2018; Díaz-Troya *et al.*, 2020). However, this phenotype is alleviated when  
297 synthesis of the osmolyte glucosylglycerol, which is produced from ADP-glucose under  
298 conditions of high salt stress, is induced in the  $\Delta glgA1/2$  mutant, showing the importance of an  
299 energy dissipation pathway for acclimation to nitrogen starvation (Díaz-Troya et al., 2020).  
300 These findings, together with our observation that ATP levels rapidly drop after nitrogen step-  
301 down, even in the presence of high sodium, strongly support the idea that a decreased ATP

302 content is important for adaptation of the metabolism to nitrogen starvation. Reduction of the  
303 ATP levels may play a role in re-directing the metabolism into dormancy, since some cellular  
304 processes that are important for this transition, such as the formation of protein aggregates, are  
305 promoted by decreased cellular ATP concentrations (Pu et al., 2019). Also, ATP has been  
306 shown to act as a biological hydrotrope that influences the fluidity of the cytoplasm (Patel et  
307 al., 2017). Adaptation of the cytoplasm from a fluid to a glass-like state has important  
308 implications on molecular diffusion inside the cells and plays a relevant role in bacterial  
309 adaptation to dormancy (Parry et al., 2014). Low ATP levels might be a necessary factor for  
310 the transition of the cytoplasm into a glass-like state.

311 Although deciphering the mechanism that regulates ATP levels when cells are shifted to  
312 nitrogen-free medium was not the aim of this study, we observed that glycogen degradation is  
313 induced in the absence of sodium in chlorotic cells, probably in an attempt to maintain the  
314 cellular ATP content to a minimum level. Similarly, during resuscitation in sodium-free  
315 medium, cells respired more (i.e. degraded more glycogen) than in presence of high sodium,  
316 most likely to compensate for the lack of sodium-dependent ATP synthesis. These findings  
317 support the idea that was already proposed by Cano et al. (Cano et al., 2018). They suggested  
318 that glycogen metabolism is controlled by the intracellular energy charge and plays an  
319 important role in energy homeostasis in response to the growth phase and the environmental  
320 conditions. Nevertheless, the exact molecular mechanism that allows energy dissipation upon  
321 nitrogen removal needs yet to be elucidated.

### 322 **Proposed mechanism of sodium-dependent ATP synthesis in *Synechocystis***

323 The ATP synthase is formed by a membrane complex ( $F_0$ ), which transports the ions across  
324 the membrane, and a cytoplasmic complex ( $F_1$ ), where ATP is synthesized. It is in the c-ring  
325 within complex  $F_0$  that ion specificity is determined. In *Synechocystis* this is formed by 14  
326 copies of the subunit c (AtpE) (Pogoryelov et al., 2007; Schulz et al., 2013). Some marine  
327 cyanobacteria contain a gene encoding for a sodium-translocating AtpE in addition to the  
328 proton-translocating one (Dibrova et al., 2010). This is not the case for *Synechocystis*: In its  
329 genome there is just one gene that encodes for AtpE. Whether the c-ring binds protons or  
330 sodium ions is not dictated by major structural differences, but by slight variations in the amino  
331 acid sequence around the ion-binding site. Both, protons and sodium ions, bind a glutamate  
332 residue, and it is the nature of the amino acids surrounding this residue that determine the  
333 specificity of the c-ring. Sodium-ATP synthases have several polar groups in their ion-binding



334 site which form a complex network of hydrogen bonds, whereas proton-ATP synthases have  
335 more hydrophobic residues (Leone et al., 2015; Schulz et al., 2013). The balance between  
336 hydrophobic and polar groups makes the c-rings more or less selective towards one ion or the  
337 other. Those ATP synthases that are driven by an electrochemical proton gradient must have a  
338 high proton selectivity, since usually the concentration of sodium is much higher than the  
339 concentration of protons in physiological conditions. Some ATP synthases, like that from  
340 *Methanosarcina acetivorans*, possess proton-specific c-rings, but bind sodium physiologically  
341 because their proton specificity is not strong enough to overcome the excess of sodium (Leone  
342 et al., 2015; Schlegel et al., 2012). **Figure 8A** shows an alignment of the sequence of  
343 *Synechocystis*' AtpE with those from *Ilyobacter tartaricus*, *M. acetivorans* and *Arthrospira*  
344 *platensis*, with weak, medium and strong proton selectivity, respectively. There are 5 key amino  
345 acids (marked in orange and green) around the glutamate residue where the ion binds (marked  
346 in red) that favor sodium-binding. In the c-ring of *I. tartaricus* all of them are present: Sodium  
347 ions bind the oxygen atoms in the side chain of E65 (the main ion-binding residue), S66 and  
348 Q32, and the backbone carbonyl group of V63; additionally, the sodium ion is stabilized by a  
349 water molecule, which interacts with T67 and A64 (**Figure 8B**). *M. acetivorans*' AtpE  
350 possesses those residues that directly interact with the sodium ion, or substitutions that form  
351 identical interactions (a serine in the position of S66, a glutamate replacing Q32, which is  
352 assumed to be constitutively protonated and form the same interaction than glutamine, and a  
353 methionine substituting V63, which only participates in the interaction through the backbone  
354 carbonyl group), but lacks those residues that stabilize the water molecule, which gives the c-  
355 ring a higher proton selectivity than the one of *I. tartaricus*. *A. platensis*' AtpE has an alanine  
356 replacing S66 and a leucine in the position of T67; the presence of these hydrophobic residues  
357 confers the c-ring high proton selectivity. Around the AtpE ion-binding site, *Synechocystis*'  
358 AtpE has similar key residues to the ones of *M. acetivorans*: It also contains the polar residues  
359 that interact with the sodium ion, but not the residues that interact with the stabilizing water  
360 molecule. We thus estimated that *Synechocystis* c-ring also presents medium proton selectivity,  
361 but can bind sodium if it is in excess and the ATP synthase could therefore be responsible for  
362 sodium-dependent ATP synthesis. We could confirm this with the observation that blocking the  
363 ATP synthase by treating chlorotic cells with DCCD inhibited the sodium-dependent ATP  
364 increase. A moderate proton specificity permits the ATP synthases in the thylakoid membranes  
365 to bind protons physiologically, since the concentration of protons in the thylakoid lumen is  
366 high. However, those ATP synthases located in the plasma membrane of dormant cells that live  
367 in an alkaline environment are more likely to bind sodium. This enzyme promiscuity allows

368 dormant cells to adapt and survive to an environment where the classical ways to obtain energy  
 369 are limited.

370 Further efforts will be needed to elucidate how chlorotic cells maintain an electrochemical  
 371 sodium gradient across the plasma membrane. Previous studies have found evidence of  
 372 respiratory electron transport in the plasma membrane of *Synechocystis* (Baers et al., 2019;  
 373 Huang et al., 2002). Baers et al. suggested a simpler electron transport chain for the plasma  
 374 membrane in which NAD(P)H dehydrogenases type II (NDH II) transfer electrons to the  
 375 plastoquinone pool (PQ), from where the electrons are further transferred to an alternative  
 376 respiratory terminal oxidase (ARTO) (Baers et al., 2019). With the currently available data, we  
 377 propose that the protons transported from the cytoplasm to the periplasmic space by ARTO  
 378 could be directly used by closely located sodium/protons antiporters to extrude sodium ions  
 379 from the cytoplasm (**Figure 8C**). In experimental support to this hypothesis, we found that  
 380 NDH II and sodium/proton antiporters are up-regulated in chlorotic cells (Spät et al., 2018).  
 381 Interestingly, NdbA (slr0851), one of the three NDH II isoenzymes in *Synechocystis*, is the third  
 382 most up-regulated protein in chlorotic cells. Moreover, this model is in accordance with the  
 383 extreme sensitivity of chlorotic cells towards the inhibitor of sodium/proton antiport, EIPA.

384 Altogether, our study sheds light on the regulation of the energy metabolism during bacterial  
 385 dormancy, which plays a crucial role in the survival and spread of bacterial populations. It  
 386 remains to be seen how common the phenomenon of engaging sodium bioenergetics to adjust  
 387 ATP levels to the specific metabolic requirements of each phase of the life cycle is among  
 388 bacterial species that undergo similar developmental transitions than *Synechocystis*.

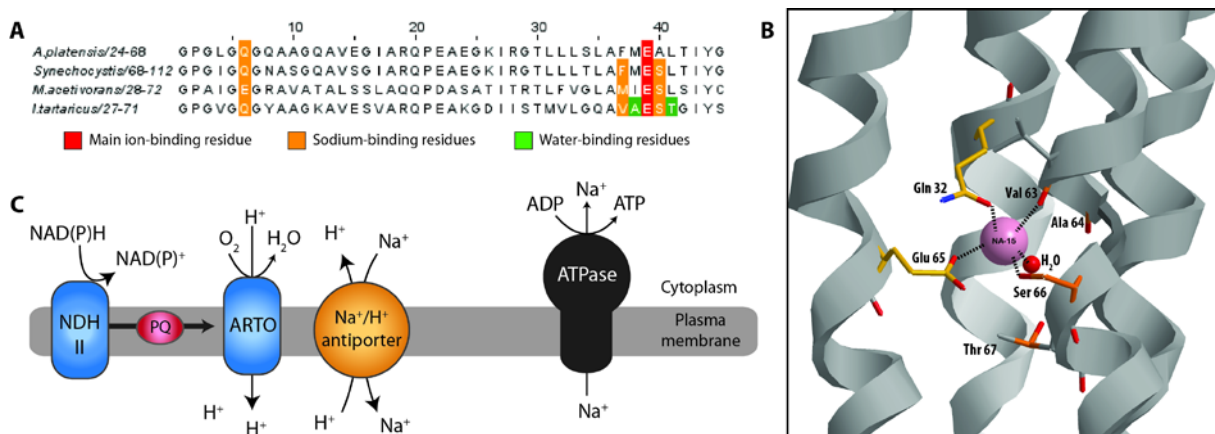

389  
 390

**Figure 8. Proposed mechanism of sodium-dependent ATP synthesis in *Synechocystis*.** (A) Alignment of the sequence of the ion-binding site of AtpE from *Arthrospira platensis*, *Synechocystis*, *Methanosarcina acetivorans* and *Ilyobacter tartaricus*. Residues involved in Na<sup>+</sup> coordination are indicated in colors. (B) Na<sup>+</sup> coordination in the c-ring from *I. tartaricus*. (C) Proposed mechanism for maintaining a Na<sup>+</sup> gradient.

391 **Acknowledgements:** We thank Dr. Libera Lo Presti for her assistance writing this  
392 manuscript.

393 **Authors contribution:** S.D. and K.F. designed the experiments. S.D. and M.B.  
394 conducted the experiments. S.D. and K.F. analyzed the data and wrote the manuscript.

395 **Funding:** This work was supported by the German Research Council (Deutsche  
396 Forschungsgemeinschaft, DFG) GRK 1708 “Molecular Principles of Bacterial Survival  
397 Strategies” and the Forschungsgruppe FOR 2816 “The Autotrophy-Heterotrophy Switch in  
398 Cyanobacteria: Coherent Decision-Making at Multiple Regulatory Layers”.

399 **Declaration of interests:** The authors declare no competing financial interest.

400

## 401 **Experimental procedures**

### 402 **Cyanobacterial cultivation conditions**

403 *Synechocystis* WT and  $\Delta glgP1/2$  (Doello et al., 2018) strains were grown in BG<sub>11</sub>  
404 supplemented with 5 mM NaHCO<sub>3</sub> for vegetative growth, as described previously (Rippka et  
405 al., 1979). The concentration of sodium in standard BG<sub>11</sub> medium is 22.5 mM. Nitrogen  
406 starvation was induced as previously described by a 2-step wash with BG<sub>11-0</sub> medium  
407 supplemented with 5 mM NaHCO<sub>3</sub>, which contains all BG<sub>11</sub> components except for NaNO<sub>3</sub>  
408 (Klotz et al., 2016; Schlebusch & Forchhammer, 2010). The concentration of sodium in  
409 standard BG<sub>11-0</sub> medium is 5.5 mM. Resuscitation was induced by addition of 17 mM NaNO<sub>3</sub>  
410 to cells residing in BG<sub>11-0</sub> (standard conditions). When indicated, 17 mM NaNO<sub>3</sub> was  
411 substituted by 17 mM KNO<sub>3</sub> or 5 mM NH<sub>4</sub>Cl in recovery experiments, with or without  
412 supplementation with 17 mM NaCl, as specified. When stated, cells were transferred to sodium-  
413 free (BG<sub>11-Na</sub> or BG<sub>11-0-Na</sub>) medium, where all sodium salts were replaced by potassium salts.  
414 When specified, cells were treated with the inhibitors DCMU (20  $\mu$ M), DBMIB (100  $\mu$ M),  
415 Antimycin A (25  $\mu$ M), CCCP (100  $\mu$ M), DNP (100  $\mu$ M), MSX (200  $\mu$ M), monensin (200  $\mu$ M),  
416 EIPA (100  $\mu$ M) and DCCD (200  $\mu$ M) for 5 minutes before the experiment was started unless  
417 otherwise indicated. Cultivation was performed with continuous illumination (50 to 60  $\mu$ mol  
418 photons m<sup>-2</sup> s<sup>-1</sup>) and shaking (130 to 140 rpm) at 27 °C.  $\Delta glgP1/2$  pre-cultures were cultivated  
419 with the appropriate concentration of antibiotics (Doello et al., 2018). Biological replicates were  
420 inoculated with the same pre-cultures, but propagated, nitrogen-starved and resuscitated  
421 independently in different flasks under identical conditions.

### 422 **Growth curves**

423 Growth curves were generated using a Multi-cultivator OD-1000 with a Gas Mixing System  
424 GMS 150 (Photosystems Instruments, Drasov, Czech Republic). Vegetative cells were grown  
425 in BG<sub>11</sub> or BG<sub>11-Na</sub> medium with and without supplementation with 2% CO<sub>2</sub>. Nitrogen  
426 starvation was induced as described above, followed by cultivation in BG<sub>11-0</sub> or BG<sub>11-0-Na</sub>  
427 medium supplemented with 2 % CO<sub>2</sub>. The OD was monitored at 720 nm. Three biological  
428 replicates per condition were measured.

#### 429 **ATP determination**

430 1 mL aliquots of bacterial cultures were taken and immediately frozen in liquid nitrogen.  
431 ATP was extracted by boiling and freezing samples 3 times consecutively (boiling at 100 °C,  
432 freezing in liquid nitrogen) and spinning them down at 25,000 g for 1 minute at 4 °C. ATP in  
433 the supernatant was quantified with the “ATP determination kit” (Molecular Probes (A22066),  
434 Oregon, USA) following the manufacturer’s protocol. 50 µl of a reaction mix containing  
435 reaction buffer, luciferin and firefly luciferase were mixed with 10 µl of the samples and the  
436 luminescence was quantified in a luminometer (Sirius Luminometer, Berthold Detection  
437 Systems). An ATP standard curve was generated and used to calculate ATP content in the  
438 collected samples. For every condition, at least three biological replicates were measured.

#### 439 **ADP determination**

440 1 mL aliquots of bacterial cultures were taken and immediately frozen in liquid nitrogen.  
441 ATP was extracted by boiling and freezing samples 3 times consecutively (boiling at 100 °C,  
442 freezing in liquid nitrogen) and spinning them down at 25,000 g for 1 minute at 4 °C. ATP in  
443 the supernatant was quantified with the “ADP Assay Kit” (MAK133, Sigma-Aldrich, Missouri,  
444 USA) following the manufacturer’s protocol. 90 µl of a reaction mix containing reaction buffer,  
445 luciferin and firefly luciferase were mixed with 10 µl of the samples and the luminescence was  
446 quantified in a luminometer to determine the  $RLU_{ATP}$ . Subsequently, “ADP enzyme” was added  
447 to the samples and the luminescence was measured again after a 2-min incubation to determine  
448 the  $RLU_{ADP}$ . An ADP standard curve was generated. The luminescence corresponding to ADP  
449 was calculated ( $RLU_{ADP}-RLU_{ATP}$ ) and the ADP content in the samples was determined using  
450 the standard curve. For every condition, at least three biological replicates were measured.

#### 451 **Glycogen determination**

452 Glycogen content was determined as described by Gründel et al. (Gründel et al., 2012) with  
453 modifications established by Klotz et al. (Klotz et al., 2016). 2 mL-samples were collected, span  
454 down and washed with distilled water. Cells were lysed by incubation in 30% KOH at 95°C for  
455 2h. Glycogen was precipitated by addition of cold ethanol to a final concentration of 70%  
456 followed by an overnight incubation at -20 °C. The precipitated glycogen was pelleted by  
457 centrifugation at 15000 g for 10 min and washed with 70% ethanol and 98% absolute ethanol,  
458 consecutively. The precipitated glycogen was dried and digested with 35 U of

459 amyloglucosidase (10115, Sigma Aldrich) in 1 mL of 100 sodium acetate pH 4.5 for 2 h. 200  
460  $\mu$ l of the samples were mixed with 1 mL of 6% O-toluidine in acetic acid and incubated at 100  
461  $^{\circ}$ C for 10 min. Absorbance was then read at 635 nm. A glucose calibration curve was used to  
462 determine the amount of glycogen in the samples. For every condition, at least three biological  
463 replicates were measured.

#### 464 **Oxygen evolution measurement**

465 Oxygen evolution was measured in vivo using a Clark-type oxygen electrode (Hansatech  
466 DW1, King's Lynn, Norfolk, UK). Light was provided from a high-intensity white light source  
467 (Hansatech L2). Oxygen evolution of 2 mL recovering cultures at an OD<sub>750</sub> of 0.5 was measured  
468 at room temperature and 50  $\mu$ mol photons  $m^{-2} s^{-1}$ . Three biological replicates per condition  
469 were measured.

#### 470 **Pulse amplification measurement (PAM)**

471 PSII activity was analyzed in vivo with a WATER-PAM chlorophyll fluorometer (Walz  
472 GmbH, Effeltrich, Germany). All samples were dark-adapted for 5 min before measurement.  
473 The maximal PSII quantum yield ( $F_v/F_m$ ) was determined with the saturation pulse method  
474 (Schreiber et al., 1995). Cultures were diluted 1:20 before the measurements in a final volume  
475 of 2 mL. Three biological and three technical replicates were measured (three measurements of  
476 each biological replicate).

477



## 478 **References**

- 479 Baers, L. L., Breckels, L. M., Mills, L. A., Gatto, L., Deery, M. J., Stevens, T. J., Howe, C. J.,  
480 Lilley, K. S., & Lea-Smith, D. J. (2019). Proteome mapping of a cyanobacterium reveals  
481 distinct compartment organization and cell-dispersed metabolism. *Plant Physiology*,  
482 *181*(4), 1721–1738. <https://doi.org/10.1104/pp.19.00897>
- 483 Burnap, R. L., Hagemann, M., & Kaplan, A. (2015). Regulation of CO<sub>2</sub> concentrating  
484 mechanism in cyanobacteria. *Life*, *5*(1), 348–371. <https://doi.org/10.3390/life5010348>
- 485 Cano, M., Holland, S. C., Artier, J., Burnap, R. L., Ghirardi, M., Morgan, J. A., & Yu, J.  
486 (2018). Glycogen Synthesis and Metabolite Overflow Contribute to Energy Balancing in  
487 Cyanobacteria. *Cell Reports*, *23*(3), 667–672.  
488 <https://doi.org/10.1016/j.celrep.2018.03.083>
- 489 Díaz-Troya, S., Roldán, M., Mallén-Ponce, M. J., Ortega-Martínez, P., & Florencio, F. J.  
490 (2020). Lethality caused by ADP-glucose accumulation is suppressed by salt-induced  
491 carbon flux redirection in cyanobacteria. *Journal of Experimental Botany*, *71*(6), 2005–  
492 2017. <https://doi.org/10.1093/jxb/erz559>
- 493 Dibrova, D. V., Galperin, M. Y., & Mulkidjanian, A. Y. (2010). Characterization of the N-  
494 ATPase, a distinct, laterally transferred Na<sup>+</sup>-translocating form of the bacterial F-type  
495 membrane ATPase. *Bioinformatics*, *26*(12), 1473–1476.  
496 <https://doi.org/10.1093/bioinformatics/btq234>
- 497 Doello, S., Klotz, A., Makowka, A., Gutekunst, K., & Forchhammer, K. (2018). A specific  
498 glycogen mobilization strategy enables rapid awakening of dormant cyanobacteria from  
499 chlorosis. *Plant Physiology*, *177*, 594–603. <https://doi.org/10.1104/pp.18.00297>
- 500 Greening, C., Grinter, R., & Chiri, E. (2019). Uncovering the Metabolic Strategies of the  
501 Dormant Microbial Majority: towards Integrative Approaches. *MSystems*, *4*(3), 1–5.  
502 <https://doi.org/10.1128/msystems.00107-19>
- 503 Gründel, M., Scheunemann, R., Lockau, W., & Zilliges, Y. (2012). Impaired glycogen  
504 synthesis causes metabolic overflow reactions and affects stress responses in the  
505 cyanobacterium *Synechocystis* sp. PCC 6803. *Microbiology (United Kingdom)*, *158*(12),  
506 3032–3043. <https://doi.org/10.1099/mic.0.062950-0>
- 507 Houmard, J. (1995). How Do Cyanobacteria Perceive and Adjust to Their Environment? In I.

- 508 Joint (Ed.), *Molecular Ecology of Aquatic Microbes* (pp. 153–170). Springer Berlin  
509 Heidelberg.
- 510 Huang, F., Parmryd, I., Nilsson, F., Persson, A. L., Pakrasi, H. B., Andersson, B., & Norling,  
511 B. (2002). Proteomics of *Synechocystis* sp. strain PCC 6803: identification of plasma  
512 membrane proteins. *Molecular & Cellular Proteomics : MCP*, *1*(12), 956–966.  
513 <https://doi.org/10.1074/mcp.M200043-MCP200>
- 514 Imashimizu, M., Bernát, G., Sunamura, E. I., Broekmans, M., Konno, H., Isato, K., Rögner,  
515 M., & Hisabori, T. (2011). Regulation of F<sub>0</sub>F<sub>1</sub>-ATPase from *Synechocystis* sp. PCC  
516 6803 by  $\gamma$  and  $\epsilon$  subunits is significant for light/dark adaptation. *Journal of Biological*  
517 *Chemistry*, *286*(30), 26595–26602. <https://doi.org/10.1074/jbc.M111.234138>
- 518 Klotz, A., & Forchhammer, K. (2017). Glycogen, a major player for bacterial survival and  
519 awakening from dormancy. *Future Microbiology*, *12*(2), 101–104.  
520 <https://doi.org/10.2217/fmb-2016-0218>
- 521 Klotz, A., Georg, J., Bučinská, L., Watanabe, S., Reimann, V., Januszewski, W., Sobotka, R.,  
522 Jendrossek, D., Hess, W. R., & Forchhammer, K. (2016). Awakening of a Dormant  
523 Cyanobacterium from Nitrogen Chlorosis Reveals a Genetically Determined Program.  
524 *Current Biology*, *26*(21), 2862–2872. <https://doi.org/10.1016/j.cub.2016.08.054>
- 525 Leone, V., Pogoryelov, D., Meier, T., & Faraldo-Gómez, J. D. (2015). On the principle of ion  
526 selectivity in Na<sup>+</sup>/H<sup>+</sup>-coupled membrane proteins: Experimental and theoretical studies  
527 of an ATP synthase rotor. *Proceedings of the National Academy of Sciences of the*  
528 *United States of America*, *112*(10), E1057–E1066.  
529 <https://doi.org/10.1073/pnas.1421202112>
- 530 Lewis, K. (2010). Persister Cells. *Annual Review of Microbiology*, *64*(1), 357–372.  
531 <https://doi.org/10.1146/annurev.micro.112408.134306>
- 532 Parry, B. R., Surovtsev, I. V., Cabeen, M. T., O’Hern, C. S., Dufresne, E. R., & Jacobs-  
533 Wagner, C. (2014). The bacterial cytoplasm has glass-like properties and is fluidized by  
534 metabolic activity. *Cell*, *156*(1–2), 183–194. <https://doi.org/10.1016/j.cell.2013.11.028>
- 535 Patel, A., Malinowska, L., Saha, S., Wang, J., Alberti, S., Krishnan, Y., & Hyman, A. A.  
536 (2017). ATP as a biological hydrotrope. *Science*, *356*(6339), 753–756.  
537 <https://doi.org/10.1126/science.aaf6846>
- 538 Pogoryelov, D., Reichen, C., Klyszejko, A. L., Brunisholz, R., Muller, D. J., Dimroth, P., &

- 539 Meier, T. (2007). The oligomeric state of c rings from cyanobacterial F-ATP synthases  
540 varies from 13 to 15. *Journal of Bacteriology*, *189*(16), 5895–5902.  
541 <https://doi.org/10.1128/JB.00581-07>
- 542 Pu, Y., Li, Y., Jin, X., Tian, T., Ma, Q., Zhao, Z., Lin, S. yuan, Chen, Z., Li, B., Yao, G.,  
543 Leake, M. C., Lo, C. J., & Bai, F. (2019). ATP-Dependent Dynamic Protein Aggregation  
544 Regulates Bacterial Dormancy Depth Critical for Antibiotic Tolerance. *Molecular Cell*,  
545 *73*(1), 143-156.e4. <https://doi.org/10.1016/j.molcel.2018.10.022>
- 546 Rippka, R., Deruelles, J., Waterbury, J. B., Herdman, M., & Stanier, R. Y. (1979). Generic  
547 Assignments, Strain Histories and Properties of Pure Cultures of Cyanobacteria.  
548 *Microbiology*, *111*(1), 1–61. <https://doi.org/10.1099/00221287-111-1-1>
- 549 Rittershaus, E., Baek, S., & Sasseti, C. (2013). The normalcy of dormancy. *Cell Host*  
550 *Microbe*, *13*(6), 643–651. <https://doi.org/10.1016/j.chom.2013.05.012>.The
- 551 Schlebusch, M., & Forchhammer, K. (2010). Requirement of the nitrogen starvation-induced  
552 protein s110783 for polyhydroxybutyrate accumulation in synechocystis sp. strain PCC  
553 6803. *Applied and Environmental Microbiology*, *76*(18), 6101–6107.  
554 <https://doi.org/10.1128/AEM.00484-10>
- 555 Schlegel, K., Leone, V., Faraldo-Gómez, J. D., & Müller, V. (2012). Promiscuous archaeal  
556 ATP synthase concurrently coupled to Na<sup>+</sup> and H<sup>+</sup> translocation. *Proceedings of the*  
557 *National Academy of Sciences of the United States of America*, *109*(3), 947–952.  
558 <https://doi.org/10.1073/pnas.1115796109>
- 559 Schreiber, U., Endo, T., Mi, H., & Asada, K. (1995). Quenching analysis of chlorophyll  
560 fluorescence by the saturation pulse method: Particular aspects relating to the study of  
561 eukaryotic algae and cyanobacteria. *Plant and Cell Physiology*, *36*(5), 873–882.  
562 <https://doi.org/10.1093/oxfordjournals.pcp.a078833>
- 563 Schulz, S., Iglesias-Cans, M., Krah, A., Yildiz, Ö., Leone, V., Matthies, D., Cook, G. M.,  
564 Faraldo-Gómez, J. D., & Meier, T. (2013). A New Type of Na<sup>+</sup>-Driven ATP Synthase  
565 Membrane Rotor with a Two-Carboxylate Ion-Coupling Motif. *PLoS Biology*, *11*(6).  
566 <https://doi.org/10.1371/journal.pbio.1001596>
- 567 Shibata, M., Katoh, H., Sonoda, M., Ohkawa, H., Shimoyama, M., Fukuzawa, H., Kaplan, A.,  
568 & Ogawa, T. (2002). Genes essential to sodium-dependent bicarbonate transport in  
569 cyanobacteria: Function and phylogenetic analysis. *Journal of Biological Chemistry*,

- 570           277(21), 18658–18664. <https://doi.org/10.1074/jbc.M112468200>
- 571 Spät, P., Klotz, A., Rexroth, S., Maček, B., & Forchhammer, K. (2018). Chlorosis as a  
572 developmental program in cyanobacteria: The proteomic fundament for survival and  
573 awakening. *Molecular and Cellular Proteomics*, 17(9), 1650–1669.  
574 <https://doi.org/10.1074/mcp.RA118.000699>
- 575 Vitousek, P. M., & Howarth, R. W. (1990). Nitrogen limitation on land and sea: How can it  
576 occur? *Biogeochemistry*, 13(87), 87–115. <https://doi.org/10.1007/BF00002772>
- 577

## 578 Supplemental material

579 **Figure S1. Residual photosynthetic activity is still present during the first hour of**  
580 **resuscitation and it is lost in the absence of sodium.** Photosystem II quantum yield  
581 determined by pulse-amplitude-modulation (PAM) fluorometry of WT cells during recovery  
582 from chlorosis in the presence and absence of sodium.  $\Delta F$  yield represents the maximal PSII  
583 quantum yield ( $F_v/F_m$ ). 3 biological and 3 technical replicates were measured.

584 **Figure S2. Inhibition of sodium transport blocks photosynthetic activity in vegetative**  
585 **cells.** Photosystem II quantum yield determined by pulse-amplitude-modulation (PAM)  
586 fluorometry of WT vegetative cells treated with 100  $\mu\text{M}$  EIPA.  $\Delta F$  yield represents the maximal  
587 PSII quantum yield ( $F_v/F_m$ ). 3 biological and 3 technical replicates were measured.

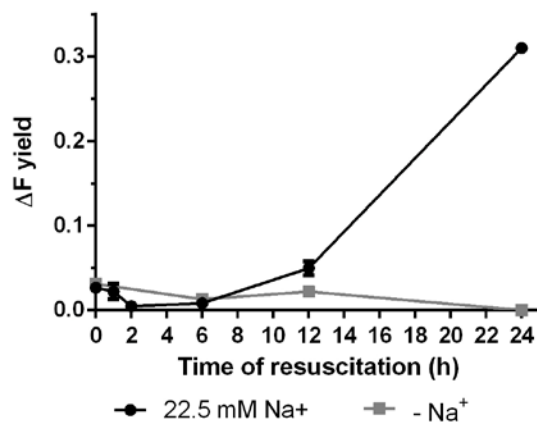

588 Figure S1

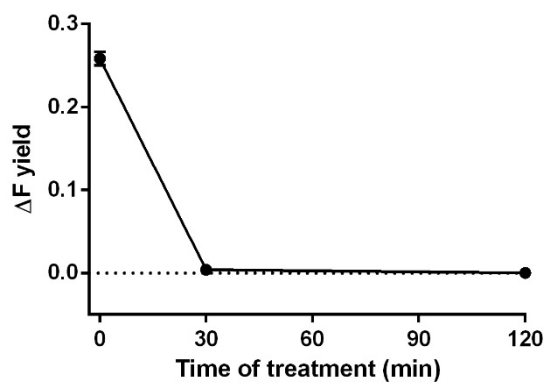

589 Figure S2
